# Supplementary material for: Does increase in women's empowerment and socio-economic conditions affect uptake of breast cancer screening? Findings from NFHS (5), India
Source: Research Square preprint supplement (doi:10.21203/rs.3.rs-1640562/v1), 2022-05-16
Supplement: Supplementary file 1 [file 3de39fb9fbc41cb021f563d2.docx]

**Supplementary Table-1: State wise list of composite scores for Socio-Economic Status (SES), Women Empowerment Status (WES) and Breast Cancer Screening DI ranking for women belongs to 30 to 49 years age.**

| State | Indices | | |
| --- | --- | --- | --- |
| SES | WES | BC Screening |
| Tamilnadu | 3.85 | 4.75 | 1 |
| Puducherry | 4.45 | 4.95 | 0.75 |
| Mizoram | 4.2 | 3.8 | 0.47 |
| Kerala | 4.32 | 3.63 | 0.42 |
| Manipur | 2.49 | 4.03 | 0.28 |
| A & N Islands | 3.77 | 3.83 | 0.28 |
| Maharashtra | 3.37 | 2.61 | 0.23 |
| Goa | 4.56 | 4.21 | 0.22 |
| Andhra Pradesh | 3.45 | 3.15 | 0.14 |
| Madhya Pradesh | 2.13 | 1.61 | 0.09 |
| Meghalaya | 1.68 | 3.28 | 0.09 |
| Lakshadweep | 4.04 | 2.85 | 0.09 |
| Himachal Pradesh | 3.61 | 3.38 | 0.08 |
| Uttar Pradesh | 1.96 | 2.05 | 0.07 |
| Bihar | 1.76 | 1.77 | 0.06 |
| Punjab | 3.93 | 3.67 | 0.06 |
| Arunachal Pradesh | 2.58 | 3.72 | 0.06 |
| Tripura | 2.58 | 1.93 | 0.06 |
| Karnataka | 3.44 | 3.73 | 0.06 |
| Telangana | 3.6 | 4.21 | 0.06 |
| Haryana | 3.64 | 2.45 | 0.05 |
| Jammu & Kashmir | 3.19 | 2.81 | 0.05 |
| Delhi | 4.32 | 3.07 | 0.05 |
| Nagaland | 3.1 | 2.93 | 0.05 |
| Chhattisgarh | 2.71 | 2.87 | 0.04 |
| Odisha | 1.99 | 3.01 | 0.04 |
| DNH & DD | 3.37 | 3.89 | 0.04 |
| West Bengal | 2.63 | 2.11 | 0.03 |
| Ladakh | 2.58 | 3.65 | 0.03 |
| Rajasthan | 2.49 | 2.17 | 0.03 |
| Uttarakhand | 3.41 | 2.83 | 0.03 |
| Assam | 1.65 | 2.39 | 0.03 |
| Jharkhand | 1.22 | 2.78 | 0.02 |
| Sikkim | 3.85 | 3.87 | 0.02 |
| Gujarat | 3.14 | 2.28 | 0.02 |
| Chandigarh | 4.26 | 3.6 | 0 |
